# Supplementary material for: Suspected Adverse Effects After Human Papillomavirus Vaccination: A Temporal Relationship Between Vaccine Administration and the Appearance of Symptoms in Japan
Source: PubMed Central journal article supplement — Drug Saf. 2017 Jul 25;40(12):1219–29. doi: 10.1007/s40264-017-0574-6 (PMC5688202; doi:10.1007/s40264-017-0574-6), 2017-07-25
Supplement: 40264_2017_574_MOESM1_ESM.pdf [file 40264_2017_574_MOESM1_ESM.pdf]

Suspected adverse effects after human papillomavirus vaccination: a temporal relationship between vaccine administration and the appearance of symptoms in Japan

Kazuki Ozawa<sup>1,a</sup>, Akiyo Hineno<sup>1,2,a</sup>, Tomomi Kinoshita<sup>1</sup>, Sakiko Ishihara<sup>3</sup>, Shu-ichi Ikeda<sup>2,\*</sup>

<sup>a</sup> Ozawa K and Hineno A contributed equally to this study.

<sup>1</sup> Department of Medicine (Neurology and Rheumatology), Shinshu University School of Medicine, Matsumoto 390-8621, Japan

<sup>2</sup> Intractable Disease Care Center, Shinshu University Hospital, Matsumoto 390-0802, Japan

<sup>3</sup> Department of Rehabilitation, Shinshu University Hospital, Matsumoto 390-8621, Japan

Running heading: Suspected adverse effects after human papillomavirus vaccination in Japan

\* Corresponding author:

Shi-ichi Ikeda

Management Center for Intractable Diseases, Shinshu University Hospital

Matsumoto 390-0802, Japan

Tel: +81-263-37-3148

Fax: +81-263-34-6589

E-mail: [ikedasi@shinshu-u.ac.jp](mailto:ikedasi@shinshu-u.ac.jp)

NAME \_\_\_\_\_ FAX \_\_\_\_\_  
 Intractable Disease Care Center, Shinshu University Hospital TEL 0263-37-3148 FAX 0263-37-3149  
 Intractable Disease Care Center, Shinshu University Hospital Shu-Ichi Ikeda  
 FAX: 0263-34-6589 e-mail: ikedasi@shinshu-u.ac.jp

**Inquiry paper**

Please fill it out as far as you understand it about the following matter.

|                                                      |                                   |
|------------------------------------------------------|-----------------------------------|
| Date                                                 |                                   |
| Your name                                            |                                   |
| Address                                              | 〒                                 |
| Telephone number                                     | (     )                           |
| Fax number                                           | (     )                           |
| Mobile telephone number                              |                                   |
| e-mail                                               |                                   |
| Relationship to the patient                          |                                   |
| About the patient                                    | ID (Shinshu University Hospital): |
| Patient's name                                       |                                   |
| Date of birth/ age                                   |                                   |
| The hospital where you receive medical treatment now |                                   |
| Hospital's name/ address                             |                                   |
| Doctor's name                                        |                                   |
|                                                      |                                   |
| kind of the HPV vaccine                              | (   ) Gardasil    (   ) Cervarix  |
| Date of vaccination: first                           |                                   |
| Date of vaccination: second                          |                                   |
| Date of vaccination: third                           |                                   |
| Main symptoms                                        |                                   |
| Other symptoms                                       |                                   |
| The condition before the vaccination                 |                                   |
| Medication                                           |                                   |
| The progress after the vaccination                   |                                   |
